# Supplementary material for: Comparative Lipid Profiling of the Cnidarian Aiptasia pallida and Its Dinoflagellate Symbiont
Source: PubMed Central journal article supplement (PMC3587569; doi:10.1371/journal.pone.0057975), 2013-03-04

Figure S1

**A**

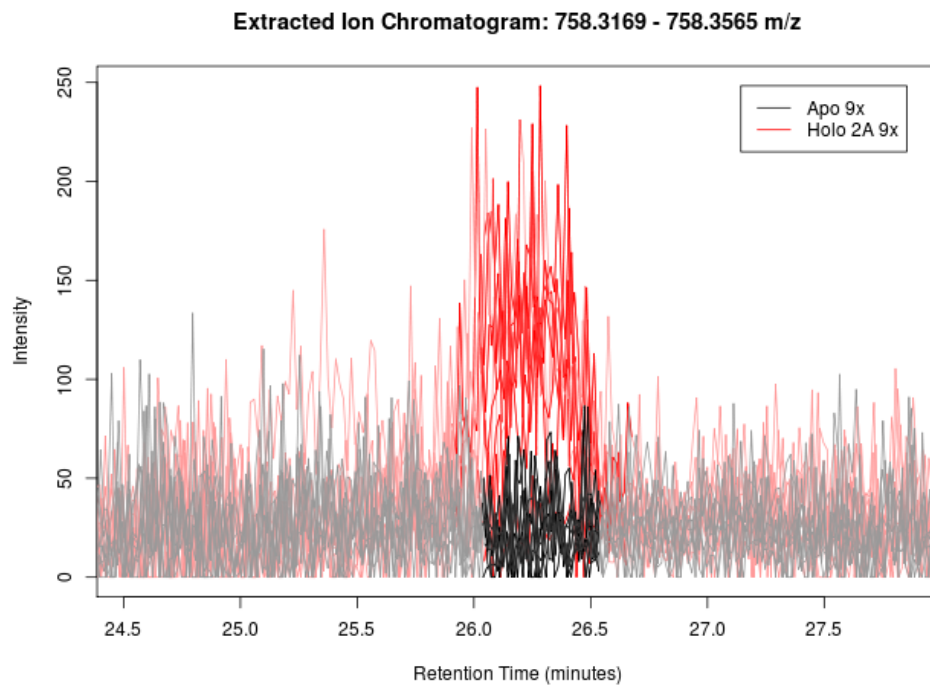

**B**

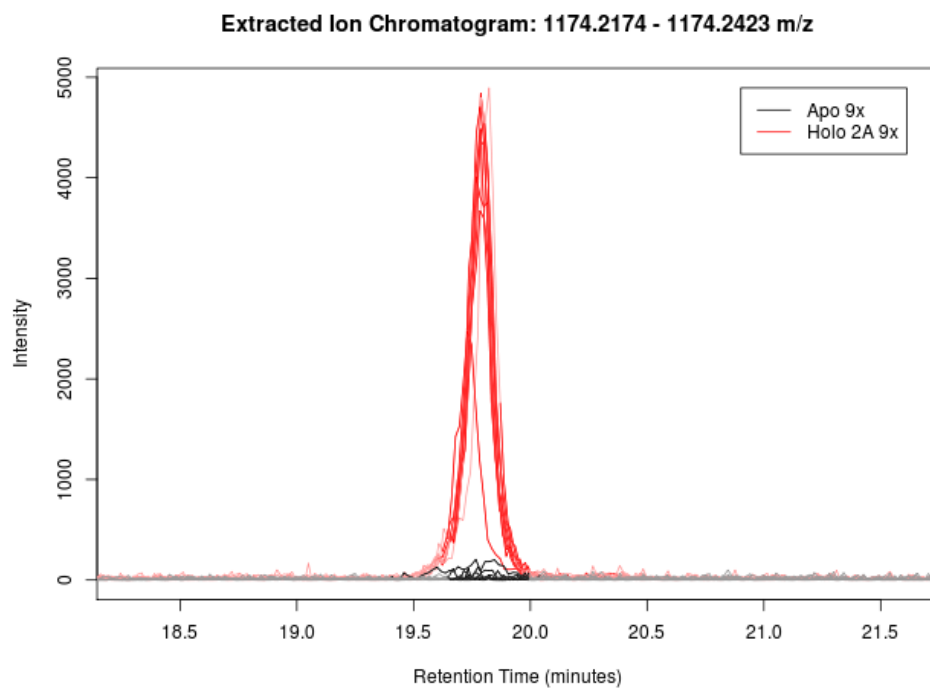

Supplement: pone.0057975.s001.pdf [file pone.0057975.s001.pdf]
